# Supplementary material
Source: Springer Nature journal article supplement (https://www.springermedizin.de/resource/supplementary/12913_2014_3390_MOESM1_ESM.pdf/9532652)
Supplement: MOESM1 [file 9532652]

## eTables / eFigures

- 1) eTable 1: Clinical group descriptors by diagnostic and procedural codes.
- 2) eTable 2: Highest numbers of deaths by OPCS-4, ICD-10 and HRG codes providing the basis for the selection of the 20 emergency groups.
- 3) eTable 3: Results from the inter-relationship quintile analysis for in-hospital all-cause risk-stratified mortality.
- 4) eTable 4: Results from the inter-relationship quintile analysis for 1-year all-cause risk-stratified mortality.
- 5) eTable 5: Results from the inter-relationship quintile analysis for all-cause risk-stratified 28-day emergency readmissions.
- 6) eFigure 1: Figures from the inter-relationship quintile analysis for in-hospital all-cause risk-stratified mortality.
- 7) eFigure 2: Figures from the inter-relationship quintile analysis for 1-year all-cause risk-stratified mortality.
- 8) eFigure 3: Figures from the inter-relationship quintile analysis for all-cause risk-stratified 28-day emergency readmissions.

| <b>Emergency medical condition/surgical procedure</b> | <b>ICD-10 codes (medical)/OPCS-4 codes (surgical)</b>                                                                                                                                                                                                                                                                                                                                    | <b>Additional logic</b>                             |
|-------------------------------------------------------|------------------------------------------------------------------------------------------------------------------------------------------------------------------------------------------------------------------------------------------------------------------------------------------------------------------------------------------------------------------------------------------|-----------------------------------------------------|
| Acute myocardial infarction (AMI)                     | I21 Acute myocardial infarction<br>I22 Subsequent myocardial infarction                                                                                                                                                                                                                                                                                                                  | Emergency mode of admission, primary diagnosis only |
| Congestive cardiac failure (CCF)                      | I50 Heart failure<br>I110 Hypertensive heart disease with heart failure                                                                                                                                                                                                                                                                                                                  | Emergency mode of admission, primary diagnosis only |
| Stroke (CVA)                                          | I61 Intracerebral haemorrhage<br>I63 Cerebral infarction<br>I64 Stroke, not specified as haemorrhage or infarction                                                                                                                                                                                                                                                                       | Emergency mode of admission, primary diagnosis only |
| Pneumonia (LRTI)                                      | J10 Influenza due to other identified influenza virus<br>J11 Influenza, virus not identified<br>J12 Viral pneumonia NEC*<br>J13 Pneumonia due to Streptococcus pneumoniae<br>J14 Pneumonia due to Haemophilus influenzae<br>J15 Bacterial pneumonia NEC*<br>J16 Pneumonia due to other organisms NEC*<br>J17 Pneumonia in bacterial diseases EC**<br>J18 Pneumonia, organism unspecified | Emergency mode of admission, primary diagnosis only |
| Pulmonary embolism (PE)                               | I26 Pulmonary embolism                                                                                                                                                                                                                                                                                                                                                                   | Emergency mode of admission, primary diagnosis only |
| Urinary tract infection (UTI)                         | N390 Urinary tract infection, site not specified<br>N30 Cystitis                                                                                                                                                                                                                                                                                                                         | Emergency mode of admission, primary diagnosis only |
| Sepsis (SEPSIS)                                       | A40 Streptococcal sepsis<br>A41 Other sepsis<br>A392-A394 Meningococcaemia<br>R508 Other specified fever<br>R509 Fever, unspecified                                                                                                                                                                                                                                                      | Emergency mode of admission, primary diagnosis only |

|                                         |                                                                                                                                                                                                                                                                                                                                                                                                                                                                                                                                                                                                                                                                                                                                                                                                                                                                            |                                                     |
|-----------------------------------------|----------------------------------------------------------------------------------------------------------------------------------------------------------------------------------------------------------------------------------------------------------------------------------------------------------------------------------------------------------------------------------------------------------------------------------------------------------------------------------------------------------------------------------------------------------------------------------------------------------------------------------------------------------------------------------------------------------------------------------------------------------------------------------------------------------------------------------------------------------------------------|-----------------------------------------------------|
|                                         | R572 Septic shock<br>R578 Other shock<br>R579 Shock, unspecified                                                                                                                                                                                                                                                                                                                                                                                                                                                                                                                                                                                                                                                                                                                                                                                                           |                                                     |
| Cardiac Arrest (CA)                     | I46 Cardiac arrest                                                                                                                                                                                                                                                                                                                                                                                                                                                                                                                                                                                                                                                                                                                                                                                                                                                         | Emergency mode of admission, primary diagnosis only |
| Pancreatitis (PANC)                     | K85 Acute pancreatitis                                                                                                                                                                                                                                                                                                                                                                                                                                                                                                                                                                                                                                                                                                                                                                                                                                                     | Emergency mode of admission, primary diagnosis only |
| Repair of fractured neck of femur (NOF) | W191 Primary open reduction of fracture of neck of femur and open fixation using pin and plate<br>W241 Closed reduction of intracapsular fracture of neck of femur and fixation using nail or screw<br>W461 Primary prosthetic replacement of head of femur using cement<br>W468 Other specified prosthetic replacement of head of femur using cement<br>W469 Unspecified prosthetic replacement of head of femur using cement<br>W471 Primary prosthetic replacement of head of femur not using cement<br>W478 Other specified prosthetic replacement of head of femur not using cement<br>W479 Unspecified prosthetic replacement of head of femur not using cement<br>W481 Primary prosthetic replacement of head of femur NEC*<br>W488 Other specified other prosthetic replacement of head of femur<br>W489 Unspecified other prosthetic replacement of head of femur | Emergency mode of admission, primary procedure only |
| Emergency hernia surgery (HERNIA)       | T97 Repair of recurrent umbilical hernia<br>T20 Repair of primary inguinal hernia<br>T21 Repair of recurrent inguinal hernia<br>T22 Repair of primary femoral hernia<br>T23 Repair of recurrent femoral hernia<br>T24 Repair of umbilical hernia<br>T25 Repair of incisional hernia                                                                                                                                                                                                                                                                                                                                                                                                                                                                                                                                                                                        | Emergency mode of admission, primary procedure only |

|                                           |                                                                                                                                                                                                                                                                                                                                                                                                                                                                                                                                                                                           |                                                     |
|-------------------------------------------|-------------------------------------------------------------------------------------------------------------------------------------------------------------------------------------------------------------------------------------------------------------------------------------------------------------------------------------------------------------------------------------------------------------------------------------------------------------------------------------------------------------------------------------------------------------------------------------------|-----------------------------------------------------|
|                                           | T26 Repair of recurrent incisional hernia<br>T27 Repair of ventral hernia                                                                                                                                                                                                                                                                                                                                                                                                                                                                                                                 |                                                     |
| Emergency appendicectomy (APPEND)         | H01 Emergency excision of appendix<br>H028 Other specified other excision of appendix<br>H029 Unspecified other excision of appendix<br>H03 Drainage of abscess of appendix                                                                                                                                                                                                                                                                                                                                                                                                               | Emergency mode of admission, primary procedure only |
| Emergency peptic ulcer surgery (PEPTIC)   | G351 Closure of perforated ulcer of stomach<br>G352 Closure of ulcer of stomach NEC<br>G358 Other specified operations on ulcer of stomach<br>G359 Unspecified operations on ulcer of stomach<br>G362 Closure of perforation of stomach NEC<br>G412 Repair of perforation of pylorus<br>G521 Closure of perforated ulcer of duodenum<br>G522 Suture of ulcer of duodenum NEC<br>G523 Oversew of blood vessel of duodenal ulcer<br>G528 Other specified operations on ulcer of duodenum<br>G529 Unspecified operations on ulcer of duodenum<br>G532 Closure of perforation of duodenum NEC | Emergency mode of admission, primary procedure only |
| Emergency colorectal laparotomy (COLOLAP) | H041 Panproctocolectomy and ileostomy<br>H05 Total colectomy<br>H06 Extended right hemicolectomy<br>H07 Right hemicolectomy<br>H08 Transverse colectomy<br>H09 Left hemicolectomy<br>H10 Sigmoid colectomy<br>H11 Colectomy NEC*<br>H12 Excision of lesion of colon<br>H13 Bypass of colon<br>H141-142, H144 Caecostomy<br>H151-153 Colostomy<br>H158-159 Exteriorisation of colon<br>H16 Caecotomy/colotomy<br>H17 Open reduction of colonic intussusception/volvulus/obstruction NEC*<br>H33 APER/anterior resection/excision                                                           | Emergency mode of admission, primary procedure only |

|                                     |                                                                                                                                                                                                                                                                                                                                                                                                                                                                                                                                                                                                                                                                                                                                                                                                                                                                                                                                                                                                                                                                                                                                                                 |                                                     |
|-------------------------------------|-----------------------------------------------------------------------------------------------------------------------------------------------------------------------------------------------------------------------------------------------------------------------------------------------------------------------------------------------------------------------------------------------------------------------------------------------------------------------------------------------------------------------------------------------------------------------------------------------------------------------------------------------------------------------------------------------------------------------------------------------------------------------------------------------------------------------------------------------------------------------------------------------------------------------------------------------------------------------------------------------------------------------------------------------------------------------------------------------------------------------------------------------------------------|-----------------------------------------------------|
|                                     | of rectum<br>G713-715 Bypass of ileum by anastomosis of ileum to colon<br>G721-725 Anastomosis of ileum to colon/rectum/anus<br>G734 Resection of ileo-colic anastomosis                                                                                                                                                                                                                                                                                                                                                                                                                                                                                                                                                                                                                                                                                                                                                                                                                                                                                                                                                                                        |                                                     |
| Emergency urological surgery (UROL) | M021 Nephrectomy and excision of perirenal tissue<br>M022 Nephroureterectomy NEC<br>M023 Bilateral nephrectomy<br>M024 Excision of half of horseshoe kidney<br>M025 Nephrectomy NEC<br>M028 Other specified total excision of kidney<br>M029 Unspecified total excision of kidney<br>M03 Partial excision of kidney<br>M04 Deroofing of cyst/destruction of kidney lesion<br>M051 Open pyeloplasty<br>M052 Open revision of pyeloplasty<br>M18 Excision of ureter<br>M34 Cystectomy<br>M35 Partial excision of bladder<br>M61 Prostatectomy<br>M058 Other specified open repair of kidney<br>M059 Unspecified open repair of kidney<br>M06 Open removal of renal calculus/drainage of kidney<br>M053 Nephropexy<br>M09 Endoscopic fragmentation/extraction of calculus of kidney<br>M10 Endoscopic destruction of lesion of kidney/pyeloplasty/deroofing of cyst<br>M13 Percutaneous biopsy/drainage/aspiration/injection of substance into kidney<br>M14 Extracorporeal fragmentation of calculus of kidney<br>M15 Nephrostomography/other specified or unspecified operations on kidney along nephrostomy tube track<br>M16 Irrigation of kidney/percutaneous | Emergency mode of admission, primary procedure only |

|                                                                      |                                                                                                                                                                                                                                                                                                                                                                                                                                                                                                                                                                                                                                                                                                                                                                                                                                                                                                                                                                                                                                                                                                                                                                     |                                                                                       |
|----------------------------------------------------------------------|---------------------------------------------------------------------------------------------------------------------------------------------------------------------------------------------------------------------------------------------------------------------------------------------------------------------------------------------------------------------------------------------------------------------------------------------------------------------------------------------------------------------------------------------------------------------------------------------------------------------------------------------------------------------------------------------------------------------------------------------------------------------------------------------------------------------------------------------------------------------------------------------------------------------------------------------------------------------------------------------------------------------------------------------------------------------------------------------------------------------------------------------------------------------|---------------------------------------------------------------------------------------|
|                                                                      | <p>nephrolithotomy NEC/removal of nephrostomy tube/other specified or unspecified operations on kidney</p> <p>M27 Ureteroscopic fragmentation/extraction of calculus of ureter/insertion of ureteric stent/dilation of ureter</p> <p>M28 Endoscopic fragmentation/removal of calculus of ureter</p> <p>M29 Endoscopic insertion/removal of prosthesis into ureter (NEC)/extirpation of lesion of ureter/dilation of ureter</p> <p>M21 Anastomosis of ureter to bladder/ureter/reconstruction of ureter</p> <p>M22 Repair of ureter</p> <p>M26 Nephroscopic fragmentation/extraction of calculus or ureter/insertion of prosthesis</p> <p>M33 Percutaneous insertion of stent into ureter</p> <p>M31 Extracorporeal fragmentation of calculus of ureter</p> <p>M37 Cystourethroplasty/repair of bladder/vesicocolic fistula/other specified or unspecified repair of bladder</p> <p>M38 Cystostomy/other specified or unspecified open drainage of bladder</p> <p>M42 Endoscopic destruction of lesion of bladder</p> <p>M44 Endoscopic removal of calculus/blood clot/foreign body from bladder/other specified or unspecified endoscopic operations on bladder</p> |                                                                                       |
| Emergency open repair of infra-renal abdominal aortic aneurysm (AAA) | <p>L184-189 Emergency replacement of aneurysmal segment of infra-renal abdominal aorta</p> <p>L194-199 Replacement of aneurysmal segment of infra-renal abdominal aorta</p> <p>L231, L236, L238-239 Plastic repair of aorta</p> <p>L254, L258, L259 Operations on aortic aneurysm NEC*</p> <p>L49 Replacement of aneurysmal iliac artery</p>                                                                                                                                                                                                                                                                                                                                                                                                                                                                                                                                                                                                                                                                                                                                                                                                                        | Elective or emergency operation codes in conjunction with emergency mode of admission |
| Emergency                                                            | L265 Percutaneous transluminal                                                                                                                                                                                                                                                                                                                                                                                                                                                                                                                                                                                                                                                                                                                                                                                                                                                                                                                                                                                                                                                                                                                                      | Elective or                                                                           |

|                                                                            |                                                                                                                                                                                                                                                                                                                                                                                                                                                                                                                                                                                                                                                                                                                                                                                                                                                                                                                                                                                                                                                                                                                                                                                                                                                                                                                                                                                       |                                                                                  |
|----------------------------------------------------------------------------|---------------------------------------------------------------------------------------------------------------------------------------------------------------------------------------------------------------------------------------------------------------------------------------------------------------------------------------------------------------------------------------------------------------------------------------------------------------------------------------------------------------------------------------------------------------------------------------------------------------------------------------------------------------------------------------------------------------------------------------------------------------------------------------------------------------------------------------------------------------------------------------------------------------------------------------------------------------------------------------------------------------------------------------------------------------------------------------------------------------------------------------------------------------------------------------------------------------------------------------------------------------------------------------------------------------------------------------------------------------------------------------|----------------------------------------------------------------------------------|
| <p>endovascular repair of infra-renal abdominal aortic aneurysm (EVAR)</p> | <p>insertion of stent into aorta<br/> L271 Endovascular insertion of stent graft for infra-renal abdominal aortic aneurysm<br/> L275 Endovascular insertion of stent graft for aortic aneurysm of bifurcation NEC<br/> L276 Endovascular insertion of stent graft for aorto-uniiliac aneurysm<br/> L278 Other specified transluminal insertion of stent graft for aneurysmal segment of aorta<br/> L279 Unspecified transluminal insertion of stent graft for aneurysmal segment of aorta<br/> L281 Endovascular stenting for infra-renal abdominal aortic aneurysm<br/> L285 Endovascular stenting for aortic aneurysm of bifurcation NEC<br/> L286 Endovascular stenting for aorto-uniiliac aneurysm<br/> L289 Unspecified transluminal operations on aneurysmal segment of aorta<br/> Any elective or emergency open AAA code in conjunction with (Y022 [other specified other endovascular placement of stent] and Z346 Z347 Z348 Z349 [abdominal aorta, infra-renal abdominal aorta, aorta NEC]), (O203 O204 O205 O208 O209 [endovascular placement of one or more stent grafts] and Y528 Y53 Y76.9 Y78 [other specified approach to organ through other opening, approach to organ under radiological control, unspecified minimal access to other body cavity, arteriotomy approach to organ using radiological guidance]), (L281 L285 L286 L289) or (L761 L762 L765 L768)</p> | <p>emergency operation codes in conjunction with emergency mode of admission</p> |
| <p>Emergency carotid endarterectomy (CEA)</p>                              | <p>L294 Endarterectomy of carotid artery and patch repair of carotid artery<br/> L295 Endarterectomy of carotid artery NEC<br/> L298 Other specified reconstruction of carotid artery<br/> L299 Unspecified reconstruction of carotid artery</p>                                                                                                                                                                                                                                                                                                                                                                                                                                                                                                                                                                                                                                                                                                                                                                                                                                                                                                                                                                                                                                                                                                                                      | <p>Emergency mode of admission</p>                                               |

|                                                             |                                                                                                                                                                                                                                                                                                                                                                                                                                                       |                                                                                       |
|-------------------------------------------------------------|-------------------------------------------------------------------------------------------------------------------------------------------------------------------------------------------------------------------------------------------------------------------------------------------------------------------------------------------------------------------------------------------------------------------------------------------------------|---------------------------------------------------------------------------------------|
| Emergency lower extremity arterial revascularisation (LEAB) | L16 Axillo-femoral bypass/other extra-anatomic aortic bypass<br>L206 Emergency aorto-iliac bypass<br>L216 Aorto-iliac bypass<br>L50 Emergency iliac bypass<br>L51 Iliac bypass<br>L52 Endarterectomy of iliac artery<br>L652-653 Revision of iliac/femoral artery reconstruction<br>L62 Repair/embolectomy of femoral artery<br>L58 Emergency femoro-distal bypass<br>L59 Femoro-distal bypass<br>L60 Endarterectomy/profundoplasty of femoral artery | Elective or emergency operation codes in conjunction with emergency mode of admission |
| Emergency lower extremity amputation (AMP)                  | X093 Amputation of leg above knee<br>X094 Amputation of leg through knee<br>X095 Amputation of leg below knee<br>X098 Other specified amputation of leg<br>X099 Unspecified amputation of leg<br>X10 Amputation of foot<br>X11 Amputation of toe<br>X12 Revision of amputation                                                                                                                                                                        | Emergency mode of admission                                                           |

OPCS-4 codes used to define emergency medical conditions and emergency surgical procedures, \*NEC = not elsewhere classified, \*\*EC = elsewhere classified

**eTable 1**



| OPCS-4 code | Description                                   | Cases  | Deaths | Death Rate |
|-------------|-----------------------------------------------|--------|--------|------------|
| U051        | Computed tomography of head                   | 232843 | 19757  | 8.5%       |
| U212        | Computed tomography                           | 172819 | 10420  | 6.0%       |
| E852        | Non-invasive ventilation                      | 41657  | 6968   | 16.7%      |
| E851        | Invasive ventilation                          | 13525  | 3406   | 25.2%      |
| U201        | Echocardiogram                                | 51385  | 2560   | 5.0%       |
| L912        | Central venous pressure monitoring            | 10838  | 2317   | 21.4%      |
| M479        | Insertion of bladder catheter                 | 22550  | 1831   | 8.1%       |
| T462        | Drainage of ascites                           | 13168  | 1716   | 13.0%      |
| X503        | Advanced cardiopulmonary resuscitation        | 1462   | 1227   | 83.9%      |
| T124        | Insertion of thoracostomy tube                | 12169  | 1187   | 9.8%       |
| W461        | Replacement of head of femur                  | 14056  | 1085   | 7.7%       |
| T123        | Aspiration of pleural cavity                  | 6447   | 890    | 13.8%      |
| G459        | Upper gastrointestinal endoscopy              | 14670  | 843    | 5.7%       |
| W242        | Open reduction/internal fixation of long bone | 14155  | 734    | 5.2%       |
| W241        | Repair of neck of femur fracture              | 9953   | 659    | 6.6%       |
| U071        | Computed tomography of chest                  | 9636   | 638    | 6.6%       |
| W471        | Repair of neck of femur fracture              | 6396   | 628    | 9.8%       |
| X403        | Haemodialysis                                 | 15077  | 613    | 4.1%       |
| U081        | Computed tomography of abdomen                | 10311  | 569    | 5.5%       |
| G451        | Upper gastrointestinal endoscopy              | 16609  | 530    | 3.2%       |
| ICD-10 code | Description                                   | Cases  | Deaths | Death Rate |
| J181        | Pneumonia                                     | 87304  | 14840  | 17.0%      |
| J189        | Pneumonia                                     | 50526  | 11053  | 21.9%      |
| I500        | Heart failure                                 | 37542  | 5887   | 15.7%      |
| N390        | Urinary tract infection                       | 117054 | 5640   | 4.8%       |
| N179        | Acute renal failure                           | 26806  | 5227   | 19.5%      |
| J180        | Pneumonia                                     | 8662   | 5116   | 59.1%      |
| A419        | Sepsis (unspecified)                          | 16378  | 5111   | 31.2%      |
| I639        | Cerebral infarction                           | 33311  | 4687   | 14.1%      |
| J690        | Pneumonitis                                   | 10259  | 4047   | 39.4%      |
| J22X        | Acute lower respiratory tract infection       | 69372  | 3826   | 5.5%       |
| J440        | Chronic obstructive pulmonary disease         | 55367  | 3611   | 6.5%       |
| S720        | Fracture of femur                             | 44206  | 3567   | 8.1%       |
| C349        | Lung cancer                                   | 13593  | 3548   | 26.1%      |
| I219        | Acute myocardial infarction                   | 28727  | 3095   | 10.8%      |
| R54X        | Senility                                      | 40826  | 2452   | 6.0%       |
| R55X        | Syncope and collapse                          | 71078  | 2409   | 3.4%       |
| I64X        | Stroke                                        | 12883  | 2257   | 17.5%      |
| R060        | Abnormalities of breathing                    | 35955  | 2184   | 6.1%       |
| I619        | Intracerebral haemorrhage                     | 5788   | 2157   | 37.3%      |
| K529        | Gastroenteritis                               | 60173  | 2051   | 3.4%       |
| HRG code    | Description                                   | Cases  | Deaths | Death      |

|     |                                                                                                |        |      | Rate  |
|-----|------------------------------------------------------------------------------------------------|--------|------|-------|
| D99 | Complex elderly with a respiratory system primary diagnosis                                    | 10344  | 3180 | 30.7% |
| DZ1 | Lung abscess/empyema/pneumonia                                                                 | 32843  | 1808 | 5.5%  |
| AA2 | Intracranial procedures except trauma                                                          | 29972  | 1237 | 4.1%  |
| D13 | Lobar, atypical or viral pneumonia with cc                                                     | 6226   | 1234 | 19.8% |
| DZ2 | Pulmonary oedema                                                                               | 12727  | 1066 | 8.4%  |
| E99 | Complex elderly with a cardiac primary diagnosis                                               | 5679   | 992  | 17.5% |
| D25 | Respiratory neoplasms                                                                          | 4693   | 924  | 19.7% |
| FZ3 | Upper gastrointestinal bleed/procedures                                                        | 83517  | 913  | 1.1%  |
| EB0 | Cardiac disorders/syncope/heart failure                                                        | 53349  | 820  | 1.5%  |
| A19 | Haemorrhagic cerebrovascular disorders                                                         | 2697   | 797  | 29.6% |
| A99 | Complex elderly with a nervous system primary diagnosis                                        | 4504   | 794  | 17.6% |
| H99 | Complex elderly with a musculoskeletal system primary diagnosis                                | 8638   | 786  | 9.1%  |
| S99 | Complex elderly with a haematology/infectious disease/poisoning/non-specific primary diagnosis | 4942   | 697  | 14.1% |
| L99 | Complex elderly with a urinary tract/male reproductive system primary diagnosis                | 3681   | 644  | 17.5% |
| A22 | Non-transient stroke or cerebrovascular accident age > 69 or w cc                              | 5687   | 627  | 11.0% |
| F46 | General abdominal disorders age > 69 or w cc                                                   | 21137  | 580  | 2.7%  |
| F36 | Large intestinal disorders age > 69 or w cc                                                    | 12493  | 460  | 3.7%  |
| LA0 | Kidney transplant/infections                                                                   | 168598 | 442  | 0.3%  |
| E28 | Cardiac arrest                                                                                 | 506    | 431  | 85.2% |
| QZ1 | Vascular surgical procedures                                                                   | 21490  | 417  | 1.9%  |

**eTable 2**

|                            | <i>Procedure-specific risk-adjusted in-hospital mortality rate by quintile of aggregated risk-adjusted in-hospital mortality rate for other nineteen groups*</i> |                   |                   |                   |                   |            |
|----------------------------|------------------------------------------------------------------------------------------------------------------------------------------------------------------|-------------------|-------------------|-------------------|-------------------|------------|
| <i>Emergency Condition</i> | <i>Quintile 1</i>                                                                                                                                                | <i>Quintile 2</i> | <i>Quintile 3</i> | <i>Quintile 4</i> | <i>Quintile 5</i> | <i>p**</i> |
| <b>AMI</b>                 | 10.7 (0.14)                                                                                                                                                      | 11.4 (0.14)       | 11.9 (0.14)       | 12.7 (0.15)       | 13.4 (0.14)       | p<0.001    |
| <b>CCF</b>                 | 15.0 (0.20)                                                                                                                                                      | 16.2 (0.20)       | 17.0 (0.21)       | 17.8 (0.21)       | 19.8 (0.22)       | p<0.001    |
| <b>CVA</b>                 | 22.5 (0.20)                                                                                                                                                      | 23.8 (0.20)       | 24.9 (0.21)       | 25.5 (0.21)       | 28.5 (0.23)       | p<0.001    |
| <b>LRTI</b>                | 23.2 (0.17)                                                                                                                                                      | 25.6 (0.16)       | 27.2 (0.17)       | 27.5 (0.17)       | 29.9 (0.19)       | p<0.001    |
| <b>PE</b>                  | 7.1 (0.22)                                                                                                                                                       | 7.6 (0.22)        | 8.0 (0.24)        | 8.8 (0.24)        | 9.5 (0.27)        | p<0.001    |
| <b>UTI</b>                 | 4.5 (0.08)                                                                                                                                                       | 5.1 (0.08)        | 5.4 (0.08)        | 5.4 (0.08)        | 5.8 (0.09)        | p<0.001    |
| <b>SEPSIS</b>              | 24.3 (0.33)                                                                                                                                                      | 25.9 (0.35)       | 29.3 (0.36)       | 29.3 (0.38)       | 32.4 (0.39)       | p<0.001    |
| <b>ARREST</b>              | 68.6 (1.52)                                                                                                                                                      | 67.6 (1.60)       | 68.0 (1.65)       | 69.2 (1.83)       | 70.7 (1.66)       | p=0.040    |
| <b>PANC</b>                | 5.1 (0.23)                                                                                                                                                       | 5.2 (0.21)        | 5.8 (0.22)        | 6.0 (0.23)        | 6.6 (0.24)        | p<0.001    |
| <b>NOF</b>                 | 7.9 (0.15)                                                                                                                                                       | 9.8 (0.16)        | 10.2 (0.17)       | 10.5 (0.17)       | 11.3 (0.17)       | p<0.001    |
| <b>HERNIA</b>              | 2.8 (0.18)                                                                                                                                                       | 2.9 (0.18)        | 3.3 (0.20)        | 3.0 (0.19)        | 3.8 (0.21)        | p<0.001    |
| <b>APPEND</b>              | 0.12 (0.02)                                                                                                                                                      | 0.21 (0.03)       | 0.17 (0.03)       | 0.22 (0.03)       | 0.25 (0.03)       | p=0.002    |
| <b>PEPTIC</b>              | 16.3 (0.93)                                                                                                                                                      | 16.9 (0.91)       | 16.1 (0.91)       | 16.1 (0.90)       | 18.5 (0.90)       | p=0.095    |
| <b>COLOLAP</b>             | 14.0 (0.40)                                                                                                                                                      | 15.2 (0.43)       | 16.0 (0.45)       | 16.3 (0.44)       | 17.6 (0.45)       | p<0.001    |
| <b>UROL</b>                | 3.2 (0.15)                                                                                                                                                       | 3.6 (0.19)        | 3.2 (0.18)        | 3.9 (0.19)        | 4.5 (0.24)        | p<0.001    |
| <b>AAA</b>                 | 28.2 (1.29)                                                                                                                                                      | 32.1 (1.55)       | 32.9 (1.66)       | 36.5 (1.87)       | 38.7 (1.64)       | p<0.001    |
| <b>EVAR</b>                | 11.9 (1.96)                                                                                                                                                      | 12.0 (2.91)       | 13.6 (3.40)       | 16.8 (4.20)       | 17.1 (5.70)       | p=0.182    |
| <b>CEA</b>                 | 0.26 (0.18)                                                                                                                                                      | 0.0 (0.0)         | 0.48 (0.48)       | 1.9 (0.95)        | 1.1 (0.80)        | p=0.039    |
| <b>LEAB</b>                | 10.7 (0.63)                                                                                                                                                      | 12.3 (0.81)       | 11.2 (0.74)       | 14.5 (0.94)       | 13.3 (0.83)       | p=0.006    |
| <b>AMP</b>                 | 8.9 (0.49)                                                                                                                                                       | 9.7 (0.57)        | 10.8 (0.58)       | 11.6 (0.63)       | 12.1 (0.60)       | p<0.001    |

\* Mean % (Standard Error); Quintile 1 = lowest aggregate in-hospital mortality rate, quintile 5 = highest aggregate in-hospital mortality rate.

\*\* Significance of aggregate in-hospital mortality quintile as a predictor of procedure-specific risk-adjusted in-hospital mortality (tested using logistic regression).

**eTable 3**

|                            | <i>Procedure-specific risk-adjusted 1-year mortality rate by quintile of aggregated risk-adjusted 1-year mortality rate for other nineteen groups*</i> |                   |                   |                   |                   |            |
|----------------------------|--------------------------------------------------------------------------------------------------------------------------------------------------------|-------------------|-------------------|-------------------|-------------------|------------|
| <i>Emergency Condition</i> | <i>Quintile 1</i>                                                                                                                                      | <i>Quintile 2</i> | <i>Quintile 3</i> | <i>Quintile 4</i> | <i>Quintile 5</i> | <i>p**</i> |
| <b>AMI</b>                 | 21.4 (0.20)                                                                                                                                            | 21.7 (0.18)       | 22.5 (0.20)       | 24.3 (0.20)       | 24.4 (0.20)       | p<0.001    |
| <b>CCF</b>                 | 40.1 (0.32)                                                                                                                                            | 40.5 (0.32)       | 42.2 (0.32)       | 43.1 (0.32)       | 44.6 (0.33)       | p<0.001    |
| <b>CVA</b>                 | 35.2 (0.25)                                                                                                                                            | 36.3 (0.25)       | 37.8 (0.25)       | 39.3 (0.26)       | 40.8 (0.27)       | p<0.001    |
| <b>LRTI</b>                | 40.9 (0.22)                                                                                                                                            | 41.4 (0.21)       | 43.4 (0.22)       | 45.0 (0.23)       | 46.5 (0.23)       | p<0.001    |
| <b>PE</b>                  | 20.7 (0.37)                                                                                                                                            | 21.1 (0.37)       | 21.7 (0.37)       | 22.5 (0.41)       | 24.5 (0.42)       | p<0.001    |
| <b>UTI</b>                 | 23.1 (0.18)                                                                                                                                            | 24.0 (0.17)       | 24.3 (0.18)       | 25.4 (0.18)       | 26.1 (0.18)       | p<0.001    |
| <b>SEPSIS</b>              | 41.2 (0.42)                                                                                                                                            | 43.7 (0.45)       | 45.6 (0.45)       | 46.7 (0.47)       | 48.8 (0.48)       | p<0.001    |
| <b>ARREST</b>              | 73.1 (1.60)                                                                                                                                            | 72.1 (1.65)       | 76.0 (1.63)       | 75.8 (1.81)       | 73.3 (1.85)       | p=0.093    |
| <b>PANC</b>                | 9.3 (0.29)                                                                                                                                             | 10.0 (0.30)       | 10.2 (0.30)       | 10.8 (0.30)       | 11.5 (0.31)       | p<0.001    |
| <b>NOF</b>                 | 27.1 (0.28)                                                                                                                                            | 27.2 (0.27)       | 28.8 (0.28)       | 29.7 (0.28)       | 30.7 (0.29)       | p<0.001    |
| <b>HERNIA</b>              | 8.4 (0.32)                                                                                                                                             | 8.4 (0.32)        | 8.7 (0.32)        | 9.1 (0.32)        | 9.3 (0.34)        | p=0.08     |
| <b>APPEND</b>              | 0.39 (0.04)                                                                                                                                            | 0.44 (0.04)       | 0.49 (0.04)       | 0.49 (0.04)       | 0.57 (0.05)       | p=0.001    |
| <b>PEPTIC</b>              | 21.9 (1.06)                                                                                                                                            | 21.0 (1.08)       | 21.8 (1.02)       | 23.3 (1.04)       | 23.4 (1.05)       | p=0.056    |
| <b>COLOLAP</b>             | 28.5 (0.58)                                                                                                                                            | 28.2 (0.60)       | 29.6 (0.58)       | 30.4 (0.60)       | 32.1 (0.62)       | p<0.001    |
| <b>UROL</b>                | 19.2 (0.39)                                                                                                                                            | 20.0 (0.41)       | 19.6 (0.43)       | 20.7 (0.47)       | 23.7 (0.54)       | p<0.001    |
| <b>AAA</b>                 | 36.3 (1.60)                                                                                                                                            | 34.9 (1.50)       | 36.3 (1.74)       | 41.6 (1.87)       | 44.0 (1.84)       | p<0.001    |
| <b>EVAR</b>                | 22.5 (2.75)                                                                                                                                            | 26.2 (3.47)       | 12.3 (3.30)       | 20.2 (6.73)       | 36.0 (9.29)       | p=0.954    |
| <b>CEA</b>                 | 5.3 (1.03)                                                                                                                                             | 7.0 (1.66)        | 6.4 (1.64)        | 11.0 (2.95)       | 8.2 (2.58)        | p=0.169    |
| <b>LEAB</b>                | 24.7 (0.99)                                                                                                                                            | 24.4 (1.02)       | 27.2 (1.24)       | 28.7 (1.25)       | 30.3 (1.34)       | p<0.001    |
| <b>AMP</b>                 | 24.9 (0.84)                                                                                                                                            | 24.3 (0.85)       | 26.6 (0.93)       | 26.5 (0.88)       | 28.1 (0.97)       | p<0.001    |

\* Mean % (Standard Error); Quintile 1 = lowest aggregate 1-year mortality rate, quintile 5 = highest aggregate 1-year mortality rate.

\*\* Significance of aggregate 1-year mortality quintile as a predictor of procedure-specific risk-adjusted 1-year mortality (tested using logistic regression).

**eTable 4**

|                            | <i>Procedure-specific risk-adjusted 28-day emergency readmission rate by quintile of aggregated risk-adjusted 28-day emergency readmission rate for other nineteen groups*</i> |                   |                   |                   |                   |            |
|----------------------------|--------------------------------------------------------------------------------------------------------------------------------------------------------------------------------|-------------------|-------------------|-------------------|-------------------|------------|
| <i>Emergency Condition</i> | <i>Quintile 1</i>                                                                                                                                                              | <i>Quintile 2</i> | <i>Quintile 3</i> | <i>Quintile 4</i> | <i>Quintile 5</i> | <i>p**</i> |
| <b>AMI</b>                 | 14.2 (0.15)                                                                                                                                                                    | 15.2 (0.18)       | 15.5 (0.18)       | 15.6 (0.17)       | 16.6 (0.18)       | p<0.001    |
| <b>CCF</b>                 | 16.7 (0.22)                                                                                                                                                                    | 18.6 (0.24)       | 19.2 (0.23)       | 19.7 (0.25)       | 20.4 (0.24)       | p<0.001    |
| <b>CVA</b>                 | 9.0 (0.14)                                                                                                                                                                     | 9.9 (0.15)        | 10.6 (0.16)       | 10.7 (0.16)       | 11.6 (0.16)       | p<0.001    |
| <b>LRTI</b>                | 13.5 (0.14)                                                                                                                                                                    | 15.0 (0.15)       | 15.6 (0.15)       | 16.0 (0.16)       | 16.7 (0.15)       | p<0.001    |
| <b>PE</b>                  | 12.6 (0.30)                                                                                                                                                                    | 12.7 (0.30)       | 14.0 (0.32)       | 14.3 (0.32)       | 15.1 (0.34)       | p<0.001    |
| <b>UTI</b>                 | 13.9 (0.15)                                                                                                                                                                    | 15.4 (0.15)       | 16.4 (0.15)       | 16.8 (0.15)       | 17.3 (0.14)       | p<0.001    |
| <b>SEPSIS</b>              | 18.1 (0.35)                                                                                                                                                                    | 18.0 (0.33)       | 18.1 (0.33)       | 19.2 (0.36)       | 19.6 (0.36)       | p<0.001    |
| <b>ARREST</b>              | 12.7 (1.23)                                                                                                                                                                    | 12.1 (1.18)       | 14.8 (1.29)       | 14.8 (1.36)       | 16.7 (1.36)       | p=0.005    |
| <b>PANC</b>                | 13.1 (0.35)                                                                                                                                                                    | 14.4 (0.37)       | 14.4 (0.37)       | 14.8 (0.37)       | 14.9 (0.36)       | p<0.001    |
| <b>NOF</b>                 | 9.9 (0.17)                                                                                                                                                                     | 10.8 (0.17)       | 11.8 (0.19)       | 12.1 (0.20)       | 12.8 (0.20)       | p<0.001    |
| <b>HERNIA</b>              | 8.3 (0.33)                                                                                                                                                                     | 9.3 (0.33)        | 10.5 (0.35)       | 10.5 (0.36)       | 10.7 (0.37)       | p<0.001    |
| <b>APPEND</b>              | 7.3 (0.17)                                                                                                                                                                     | 8.1 (0.16)        | 8.3 (0.17)        | 8.3 (0.18)        | 8.2 (0.17)        | p<0.001    |
| <b>PEPTIC</b>              | 8.5 (0.72)                                                                                                                                                                     | 9.9 (0.77)        | 10.1 (0.77)       | 9.6 (0.77)        | 10.3 (0.77)       | p=0.190    |
| <b>COLOLAP</b>             | 13.1 (0.43)                                                                                                                                                                    | 13.9 (0.43)       | 14.3 (0.45)       | 15.1 (0.47)       | 14.9 (0.46)       | p<0.001    |
| <b>UROL</b>                | 17.2 (0.46)                                                                                                                                                                    | 17.9 (0.45)       | 18.3 (0.42)       | 19.0 (0.39)       | 18.9 (0.45)       | p<0.001    |
| <b>AAA</b>                 | 10.6 (1.05)                                                                                                                                                                    | 11.5 (1.14)       | 10.9 (1.12)       | 15.0 (1.25)       | 11.6 (1.26)       | p=0.097    |
| <b>EVAR</b>                | 20.1 (5.03)                                                                                                                                                                    | 6.6 (3.83)        | 18.5 (2.96)       | 19.8 (3.55)       | 19.2 (4.53)       | p=0.245    |
| <b>CEA</b>                 | 9.7 (2.28)                                                                                                                                                                     | 6.5 (1.82)        | 11.5 (2.44)       | 7.3 (1.47)        | 10.0 (1.88)       | p=0.967    |
| <b>LEAB</b>                | 16.6 (0.99)                                                                                                                                                                    | 20.3 (1.18)       | 18.3 (0.92)       | 20.0 (1.01)       | 21.7 (1.14)       | p<0.001    |
| <b>AMP</b>                 | 13.0 (0.66)                                                                                                                                                                    | 13.4 (0.69)       | 16.6 (0.72)       | 15.5 (0.74)       | 16.7 (0.79)       | p<0.001    |

\* Mean % (Standard Error); Quintile 1 = lowest aggregate 28-day emergency readmission rate, quintile 5 = highest aggregate 28-day emergency readmission rate.

\*\* Significance of aggregate 28-day emergency readmission quintile as a predictor of procedure-specific risk-adjusted 28-day emergency readmission (tested using logistic regression).

**eTable 5**

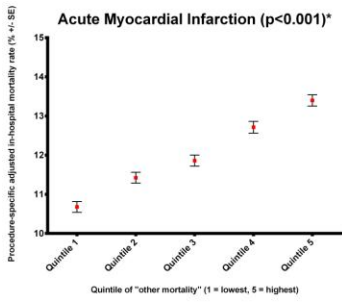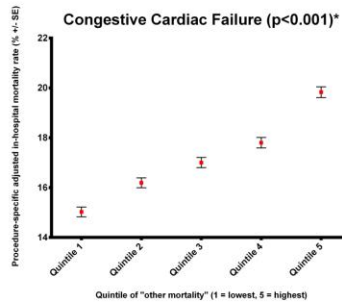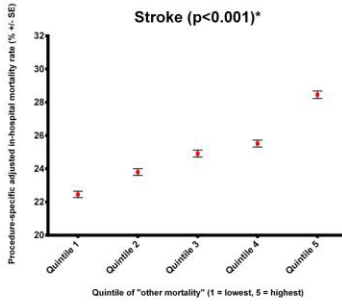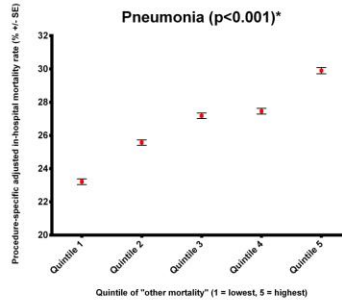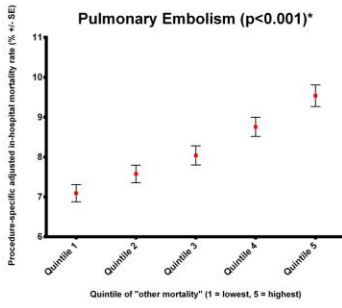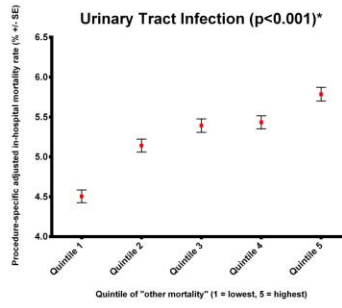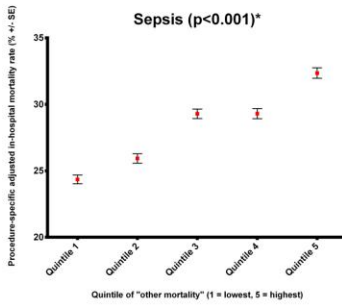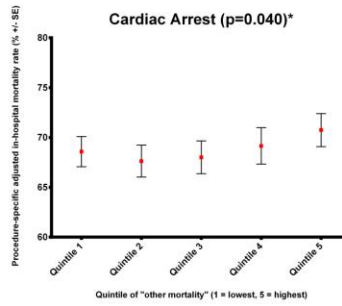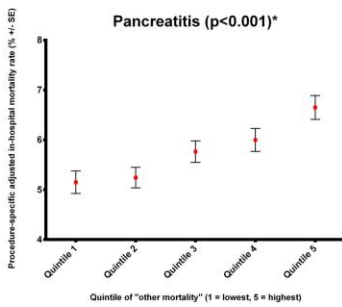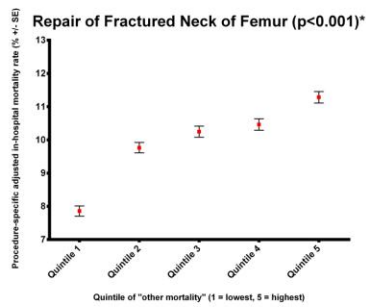

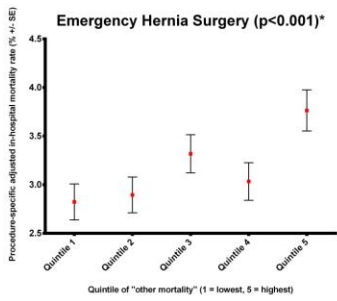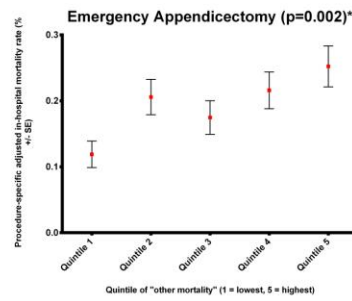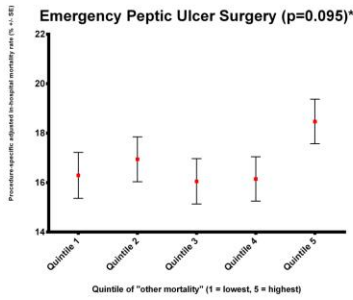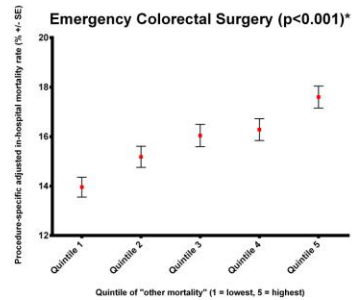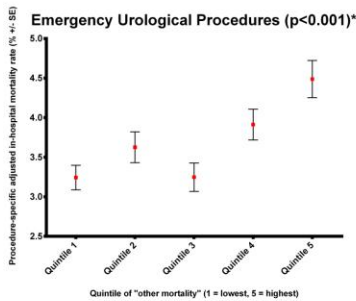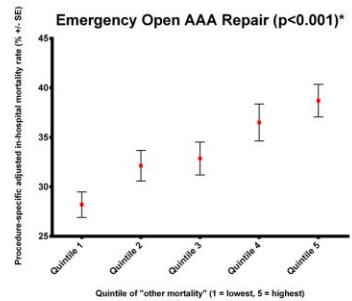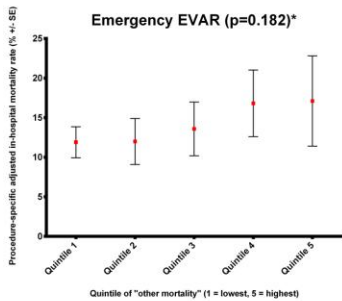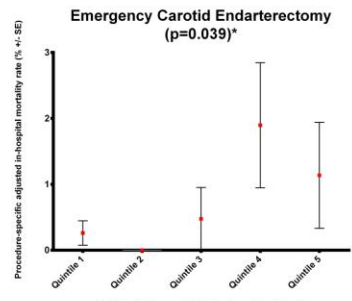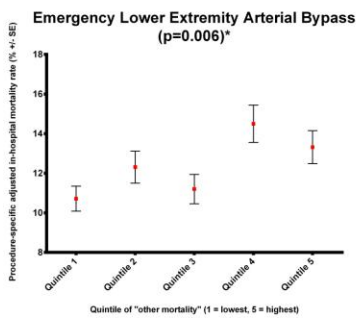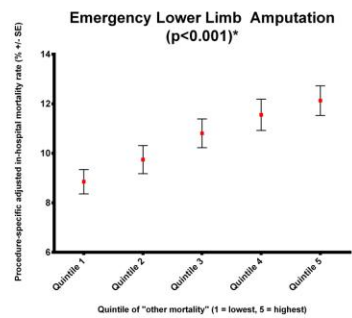

**eFigure 1**

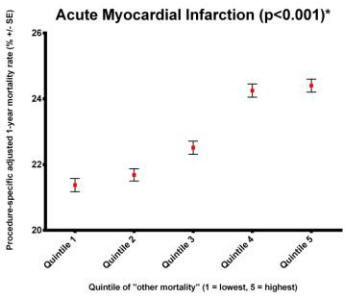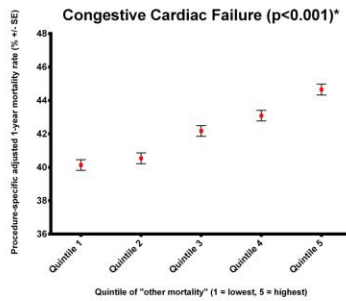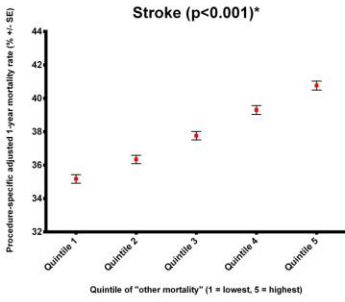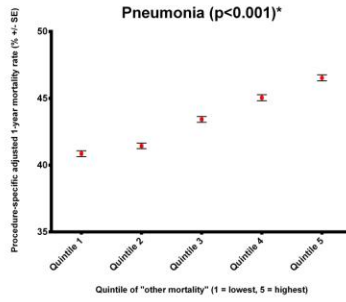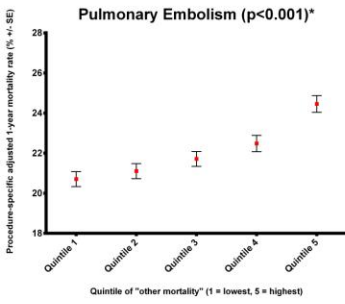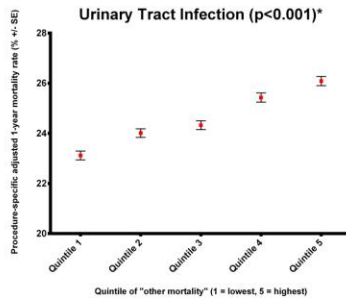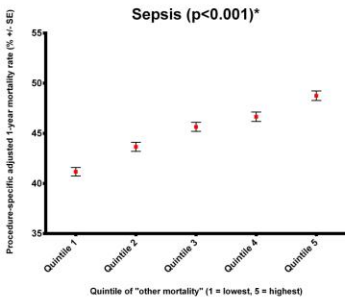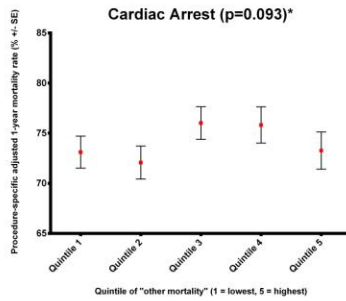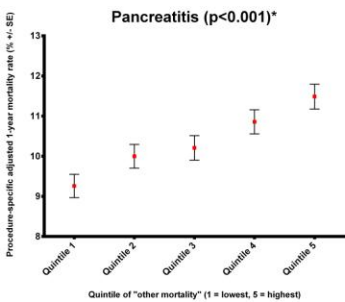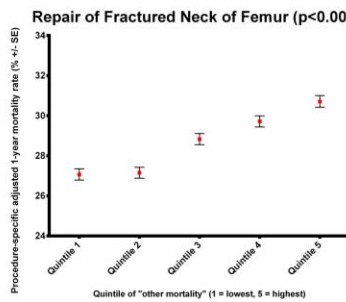



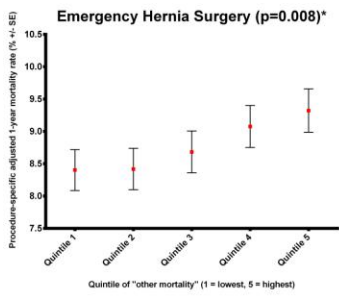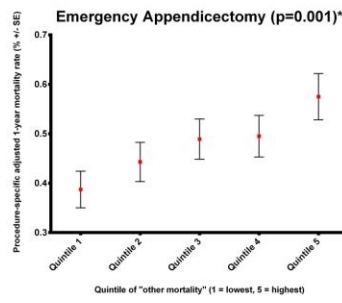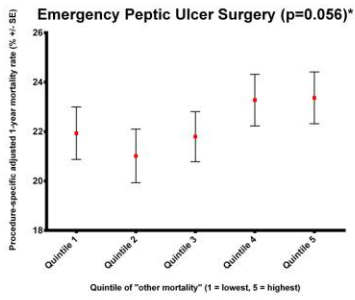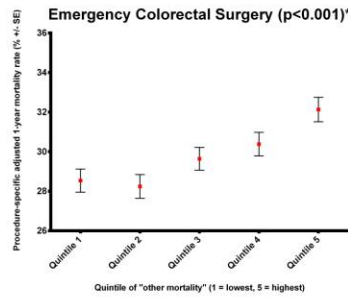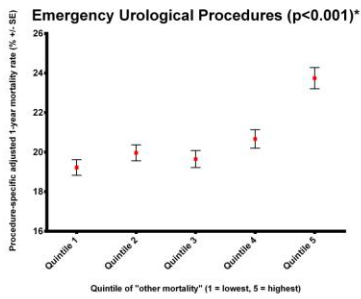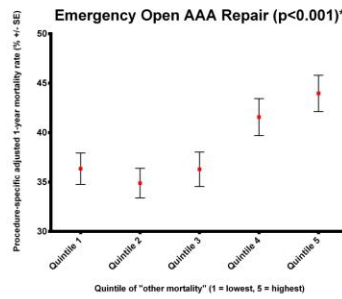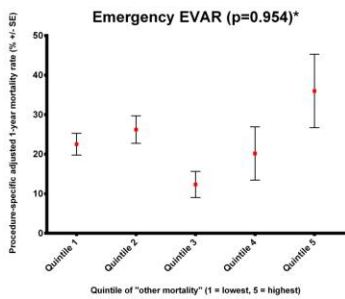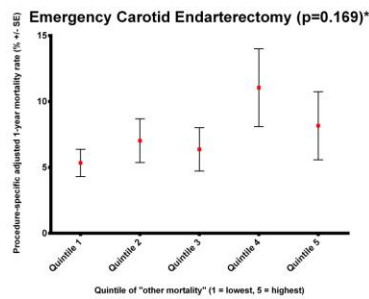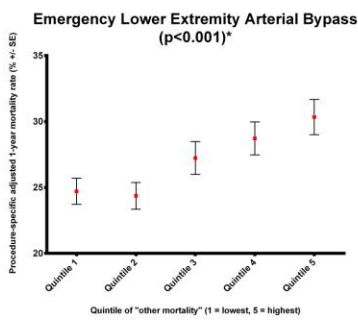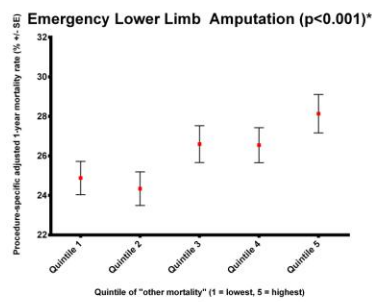

**eFigure 2**

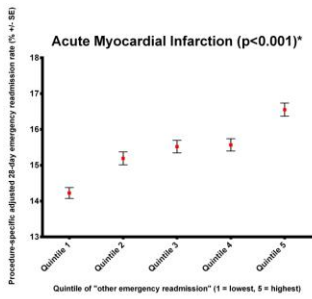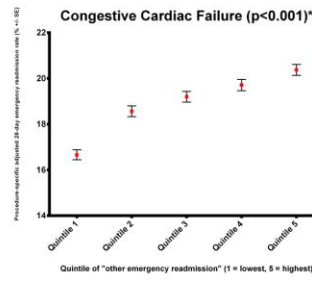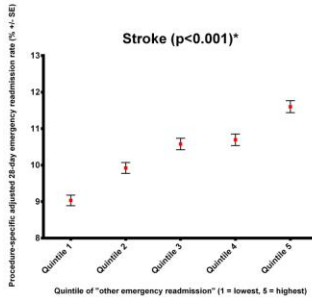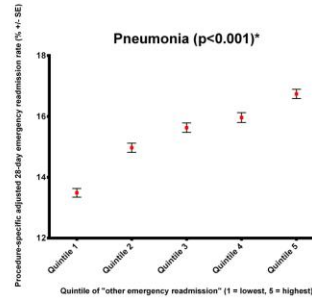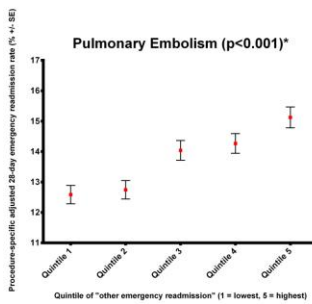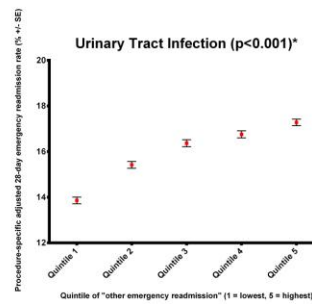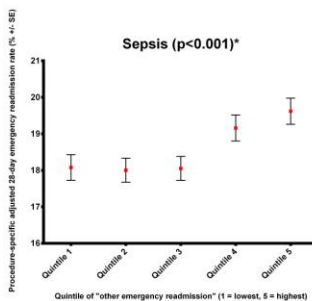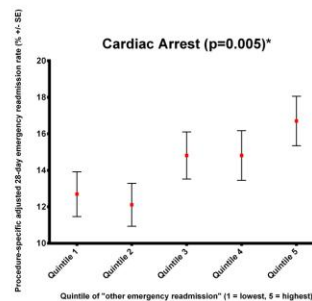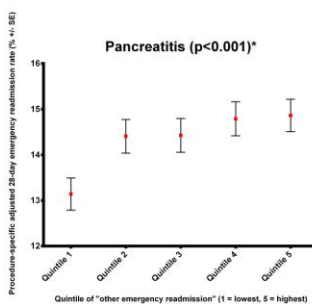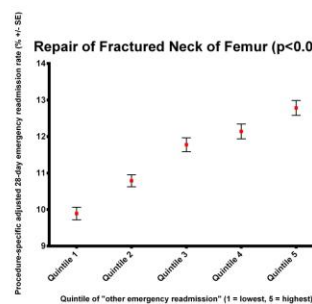

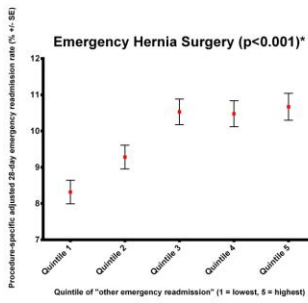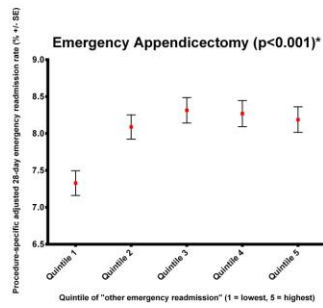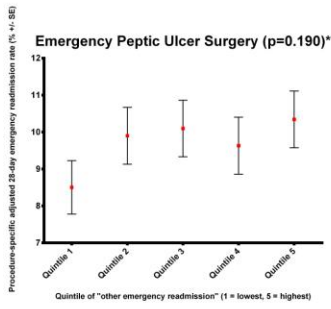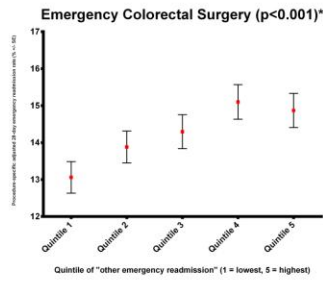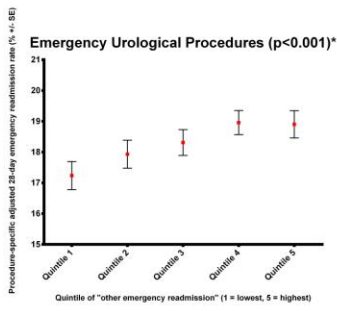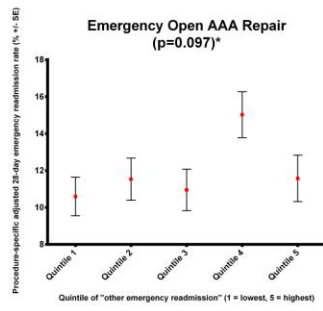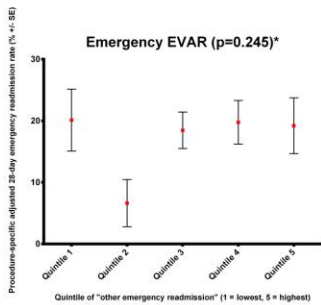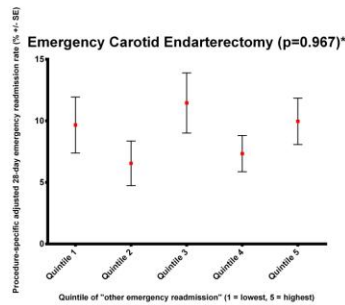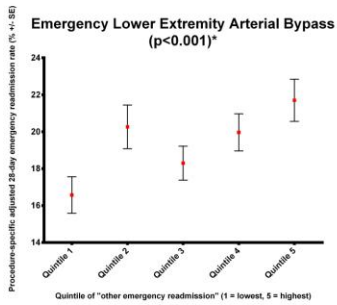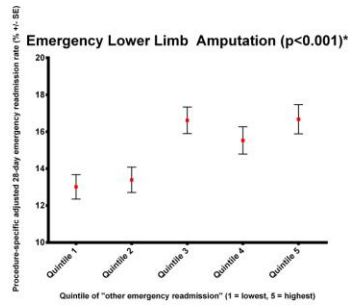

**eFigure 3**
